# 1 **A Low-Cost, 3D-Printed Biosensor for Rapid Detection of *Escherichia coli***

2 **Samir Malhotra<sup>1</sup>, Dang Song Pham<sup>1</sup>, Michael P.H. Lau<sup>2</sup>, Anh H. Nguyen<sup>2,3,\*</sup>, and Hung Cao<sup>1,2,3,\*</sup>**

3 <sup>1</sup> Department of Biomedical Engineering, University of California, Irvine, CA 92697, USA;

4 smalhot2@uci.edu

5 <sup>2</sup> Sensoriis, Inc., Edmonds, WA 98026, USA; michaelphlau@comcast.net

6 <sup>3</sup> Department of Electrical Engineering, University of California, Irvine, CA 92697, USA

7 \* Correspondence: hunganh@uci.edu (A.H.N.); hungcao@uci.edu (H.C.); Tel.: +1-949-824-8478 (H.C.)

8 **Abstract:** Detection of bacterial pathogens is significant in the fields of food safety, medicine, public  
9 health, etc. If bacterial pathogens are not treated promptly, antimicrobial resistance is possible and  
10 can lead to morbidity and mortality. Current bacterial detection methodologies rely on laborato-  
11 ry-based techniques that pose limitations such as long turnaround detection times, expensive costs,  
12 inadequate accuracy, and required trained specialists. Here, we describe a cost-effective and  
13 portable 3D-printed electrochemical biosensor that facilitates rapid detection of certain *Escherichia*  
14 *coli* (*E. coli*) strains (DH5 $\alpha$ , BL21, TOP10, and JM109) within 15 minutes using 500  $\mu$ L of sample  
15 and costs \$2.50 per test. The sensor displayed an excellent limit of detection (LOD) of 53 cfu, limit of  
16 quantification (LOQ) of 270 cfu, and showed cross-reactivity with strains BL21 and JM109 due to  
17 shared epitopes. This advantageous diagnostic device is a potential candidate for high-frequency  
18 testing at point of care as well as applicable to various fields where pathogen detection is of interest.

19 **Keywords:** biosensor; cyclic voltammetry (CV), electrochemistry; electrode; *Escherichia coli* (*E.*  
20 *coli*); ferrocene; thyroxine

## 1 **1. Introduction**

2 *Escherichia coli* (*E. coli*) are a gram-negative bacillus that is prevalent in the gastrointestinal  
3 tracts of humans and warm-blooded animals, and well-known as one of the most significant path-  
4 ogens [1]. Even though deemed harmless, numerous *E. coli* strains have acquired specific virulence  
5 attributes making them pathogenic for humans and animals. The combination of virulence factors  
6 has continued to become specific pathotypes, such as enteropathogenic *E. coli* (EPEC), shiga  
7 toxin-producing *E. coli* (STEC), enteroaggregative *E. coli* (EAEC), enterotoxigenic *E. coli* (ETEC),  
8 enteroinvasive *E. coli* (EIEC), and diffusely adherent *E. coli* (DAEC), have caused various infectious  
9 diseases in living things.

10 Current laboratory-based methods to detect food-borne pathogens depend on biochemical or mi-  
11 crobiological tests, which have long turnaround times, expensive costs, and/or inadequate sensi-  
12 tivity and specificity [3,4]. Techniques used to analyze microbiological specimens are bacterial  
13 culturing, cytometry, immunoassays, microscopy, PCR, etc. Therefore, there is an urgent demand  
14 for a rapid and cost-effective test that is capable of identifying whole-cell bacteria with adequate  
15 sensitivity and specificity. Here, we propose a 3D-printed, host-cell detection biosensor for *E. coli*  
16 using a modified graphite pencil as a sensing electrode. This sensing platform has been used in  
17 many kinds of biosensor engineering [5]. De Lima *et al.*, reported using a low-cost pencil graphite  
18 electrode coated by gold nanoparticles to detect SARS-CoV-2 on a minute scale [6]. In this study,  
19 we used thyroxine, a dual functional group molecule, and ferrocene to modify the graphite pencil  
20 electrode. This modification allows antibody conjugation and increases electrode transfer rates.

21 Cross-reactivity studies of five different *E. coli* strains (DH5 $\alpha$ , BL21, TOP10, and JM109) were  
22 performed to investigate the specificity of the biosensor. Due to its effective methodology, rapid  
23 diagnosis, and reduced costs, our biosensor can be a potential candidate for high-frequency testing  
24 at point of care as well as applicable to multiple fields where pathogen detection is of interest.

## 1 **2. Materials and Methods**

### 2 *2.1. Materials*

3 1-Ethyl-3-(3-dimethylaminopropyl)carbodiimide (EDC) with a degree of purity  $\geq 98\%$ ,  
4 N-Hydroxysuccinimide (NHS) with a degree of purity  $\geq 98\%$ , gold(III) chloride trihydrate ( $\text{HAuCl}_4 \cdot$   
5  $3\text{H}_2\text{O}$ ) (99.99%), sodium borohydride ( $\text{NaBH}_4$ ) with  $\geq 98\%$  chemical purity, cysteamine hydrochloride  
6 (Cys) with 98% chemical purity, phosphate buffer saline (PBS) solution, Silver/Silver Chloride  
7 (Ag/AgCl) paste, which was purchased from Sigma-Aldrich, was used for the reference electrode.  
8 Graphite pencil lead with 0.7 mm diameters were purchased from a local Walmart store. Anti-E.coli  
9 antibody (ab217910) was obtained from Abcam, UK. Four E. Coli-competent strains, DH5 $\alpha$ , BL21,  
10 TOP10, and JM109, were from Real Biotech Corporation (RBC) in Taiwan. Electrochemical  
11 measurements were carried out using a CH760E potentiostat, controlled by the CH Version 12.04  
12 software. A 3D-printed chamber containing three electrodes was used as the electrochemical cell  
13 (0.5-mL volume). Graphite pencils (0.7 mm) were used as working, reference, and counter elec-  
14 trodes. The graphite lead that was used as the reference electrode was coated with Ag/AgCl paste.  
15 All reagents and the deionized water (resistivity  $\geq 18 \text{ M}\Omega \cdot \text{cm}$  at 25 °C) used in this work were of  
16 analytical grade.

### 17 *2.2. Electrochemical Characterization*

18 Cyclic voltammetry (CV) and electrochemical impedance spectroscopy (EIS) were used to in-  
19 dicate electrochemical properties of the electrodes in each modification step according to de Lima  
20 et al., 2021 [5]. A potential window from 0.7 to  $-0.5 \text{ V}$  with a scan rate of  $50 \text{ mV} \cdot \text{s}^{-1}$  was set up for  
21 CV experiments. In square wave voltammetry (SWV), potentials were scanned from  $-0.8$  to  $0.4 \text{ V}$ ,  
22 corresponding to a frequency of 60 Hz, amplitude of 65 mV, and step low of 6 mV. In EIS, the fre-  
23 quency ranges from 0.1 Hz to  $1 \times 10^6 \text{ Hz}$  using amplitude of 10 mV and under open circuit potential  
24 was conducted. 0.1 mM KCL solution containing 5.0 mM of the mixture  $[\text{Fe}(\text{CN})_6]^{3-/4-}$  solution was  
25 used as electrolyte for all electrochemical characterization. Morphological characterizations of GPE

1 before and after superficial functionalization were performed using the Tescan GAIA3 SEM-FIB, a  
2 specific scanning electron microscopy (SEM), from University of California, Irvine Material Research  
3 Institute (UC IMRI). SEM images were recorded with 129 to 71,000 times magnifications, acceler-  
4 ation voltage of 30 kV, and using In-Beam SI mode. All electrochemical experiments were carried  
5 out at room temperature ( $25 \pm 3$  °C).

### 6 *2.3. Modification of Graphite Electrodes with Ferrocene*

7 The working electrode (WE) polished with 2,000-grit sandpaper, and a working area of 1.5-cm  
8 length by 0.7-mm diameter was obtained. The GPE was immersed in 10 mM L-Thyroxine dissolved  
9 in dimethylsulfoxide (DMSO) for 2.0 h as a first modification step. This process allowed the graphite  
10 surface to be functionalized with iodine groups. Then, the modified graphite substrate was kept in 5  
11 mM Ferrocene solution in toluene, which enabled ionization anchoring of Ferrocene to iodine groups  
12 of thyroxine on the electrodes. The modified electrode was washed three times in a 10 mM PBS  
13 buffer. Next, the electrodes were incubated in the solution containing 100 mM EDC and 50 mM NHS  
14 diluted in 0.1 M MES (pH = 5.0). Subsequently,  $0.3 \text{ mg. mL}^{-1}$  of anti-*E.coli* antibody was added into  
15 the tube containing the activated electrodes and vortex for 5 seconds. After 10 min, the antibody  
16 was immobilized onto the substrate, reached the anchoring stability, and provided a highly sensitive  
17 SWV response. In the presence of EDC and NHS, the carboxyl group of the antibodies covalently  
18 bonded to the primary amine of thyroxine. The reaction between carboxyl groups and EDC–NHS  
19 resulted in the formation of a stable ester, which undergoes nucleophilic substitution with the amine  
20 groups present on the modified electrode surface. This resulted in the formation of an amide bond  
21 between the modified GPE/Ferrocene/Thyroxine surface and the antibodies. In the final step,  
22 nonspecific sites present within the electrode surface were blocked by incubation in a 1% (mass/vol)  
23 BSA solution for 30 min.

### 24 *2.4. Bacterial Pathogen Sensing using the Developing Sensor*

1 For diagnosing bacterial cells, a volume of 500  $\mu\text{L}$  of each bacterial strain was applied to the  
2 three-electrode configured sensing system (Fig. 1) and incubated for 5 min. After the incubation  
3 period, the sensing system was gently washed with 0.1 mM PBS buffer (pH 7.4) to remove unbound  
4 bacterial cells. Next, 500  $\mu\text{L}$  of redox probe solution (5.0 mM  $[\text{Fe}(\text{CN})_6]^{3-/4-}$  in 0.1 M KCl) was in-  
5 jected to the chamber for voltammetry measurements and detection of current decrease due to  
6 binding of bacterial cells to the biosensor. Subsequently, the electrochemical response was moni-  
7 tored using the SWV technique. Specificity and cross-reactivity of the biosensor was evaluated in  
8 spiking samples. The total diagnostic time was calculated to be 13 min, which considered the  
9 sample incubation period (10 min), the time required to record two SWVs (before and after sample  
10 incubation, 2 min), and the washing step after sample incubation (1 min).

11 The limit of detection (LOD) and limit of quantification (LOQ) of sensor were calculated ac-  
12 cording to the four-parameter logistic curve, using Equations 1 and 2:

13

$$14 \quad L_B = \mu_{\text{blank}} + t_{(1-\alpha, n-1)} \times \sigma_{\text{blank}} \quad (1)$$

$$15 \quad L_S = L_B + t_{(1-\beta, m(n-1))} \times \sigma_{\text{test}} \quad (2)$$

16

17 where  $L_B$  is a value of blank limit and  $L_S$  is the LOD in the signal of samples;  $\mu_{\text{blank}}$  is the mean of  
18 signal intensities for  $n$  blank replicates,  $\sigma_{\text{blank}}$  is the standard deviation of blank replicates and  $\sigma_{\text{test}}$  is  
19 the pooled standard deviation of  $n$  test replicates, and  $t_{(1-\alpha, n-1)}$  is the  $1 - \alpha$  percentile of the  
20 t-distribution given  $n - 1$  degrees of freedom referring to the number of independent blank meas-  
21 urements and  $t_{(1-\beta, m(n-1))}$  is the  $1 - \beta$  percentile of the t-distribution given  $m(n - 1)$  degrees of  
22 freedom referring to the number of independent sample measurements, both at 95 % confidence  
23 interval [6].

## 1 2.5. Specificity and Cross-Reactivity Studies

2 The cross-reactivity study was performed by recording the analytical signal (current decrease  
3 of the redox probe) obtained from different batches with 1000 bacterial cells on three times of  
4 measurements. The specificity of the sensors was evaluated by the analytical sensitivity value ex-  
5 tracted from analytical curves in a concentration range from 25 to 6400 cells stored in PBS buffer  
6 (pH 7.4) and LB media. The specificity studies were carried out using the five different E.  
7 Coli-competent strains each at 100 colony-forming units (cfu). The anti-E.coli antibody was used to  
8 evaluate the capability of the sensor to detect DH5 $\alpha$ .

9 The performance of the biosensor was assessed using simulated samples prepared by mixing  
10 five strains in culture media. We set a current decrease cutoff value higher than 37  $\mu$ A for diagnostic  
11 purposes in accordance with the analytical response obtained for the lowest concentration of bac-  
12 terial cells detected (150 cfu) in the cell–response curve. Samples that exhibited the cut off value  
13 over 15  $\mu$ A were identified positive for DH5 $\alpha$ . All sample results were analyzed and compared to  
14 those obtained from quantitative polymerase chain reaction (qPCR). The threshold cycle (Ct) values  
15 obtained by qPCR for simulated samples in which genomic DNA concentration lower than that was  
16 used in the sensing) ranged from 19.8 to 27.7.

## 17 3. Results and Discussion

### 18 3.1. Electrochemical Biosensor Design

19 The electrochemical device was designed to measure binding affinity between the anti-*E.coli*  
20 antibody and E.coli cells (**Fig. 1**). The monoclonal antibody was used as a recognition element to  
21 ensure sensitive and selective bacteria detection. The graphite that was placed in a WE was func-  
22 tionalized by the drop-casting method with thyroxine and ferrocene before conjugation with the  
23 monoclonal antibody (**Fig. 1A&B**). The graphite WE were polished with a 2,000-grit sandpaper to  
24 remove impurities from the surface, and a contact area of 1.5-cm length by 0.7-mm diameter was  
25 obtained. Next, to form cross-linked elements, the WE were immersed in a 10 mM L-Thyroxine in

1 DMSO for 2.0 h as a first modification step. Thyroxine molecules have dual functional groups, such  
2 as iodine and amine groups, that facilitate the ionization and covalent attachment of ferrocene and  
3 antibodies containing carboxyl terminal moieties. Here, we leveraged thyroxine to modify the GPE's  
4 surface with ferrocene, a versatile redox molecule. Subsequently, the coupling reaction was con-  
5 ducted in two different steps. First, we added the modified electrodes in a 0.1 M MES solution  
6 containing the prepared reactive intermediary EDC and NHS to form reactive coupling linkers. This  
7 enables the anchoring between the amine groups of thyroxine and carboxyl groups of antibodies,  
8 yielding Ab/thyroxine/ferrocene/GPE after 30 min of two-step activations at room temperature [7].  
9 The electrodes were then incubated with bovine serum albumin (BSA) at 37°C for 30 min to block  
10 the electrode's unspecific binding sites after immobilization of Ab. BSA is a common blocking protein  
11 with a high density of positive lysine residues that is commonly used for blocking procedures. Next,  
12 we exposed the sensor to samples containing bacterial cells. The decrease in the peak current of a  
13 redox probe ( $[\text{Fe}(\text{CN})_6]^{-3/-4}$ ) enabled diagnosis of bacteria-free samples versus those that were  
14 infected with bacterial cells (**Fig. 1C**). Our biosensor chip is shown in Fig. 1D.

15

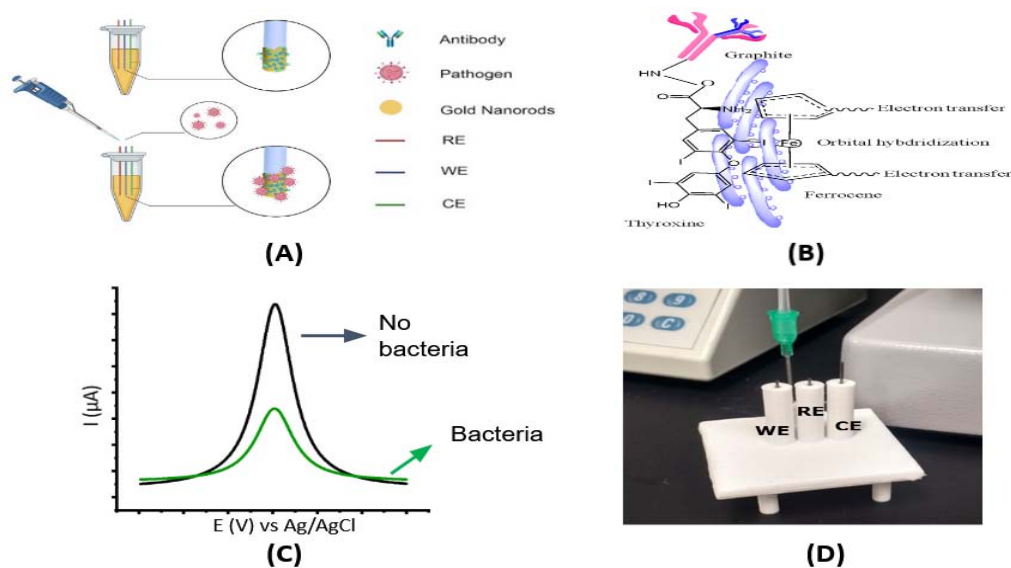

16

17 **Figure 1.** Overview of the system. **(A)** Scheme of developing an electrochemical biosensor for  
18 whole cell detection. **(B)** Thyroxine/Ferrocene functionalization on pencil graphite electrodes and

1 antibody conjugation through ECD and NHS activation. **(C)** The concept of electrochemical re-  
2 sponse of the sensor in the presence of *E. coli* based on the current drop due to specific binding of  
3 DH5 $\alpha$  to antibody coated onto electrodes. The *E. coli* cells bound onto electrode prevent electron  
4 transfers from the redox probe ( $[\text{Fe}(\text{CN})_6]^{3-/4-}$ ) to working electrodes. **(D)** An electrochemical cell  
5 containing a three-electrode configuration was made from a 3D printing protocol.

### 6 *3.2. Characterization of the Biosensor*

7 Electrochemical experiments were then performed to characterize the biosensor. The bare  
8 GPE presented a flat surface containing stacked carbon sheets (**Fig. 2A**). Successful formation of  
9 the ferrocene and thyroxine complex was confirmed by cyclic voltammetry, presenting a specific  
10 redox/oxidative peak at -0.15 and 0.15 eV vs Ag/AgCl (**Fig. 2B&C**). The thyroxine coated on the  
11 WE surface after the optimized functionalization process, facilitating the subsequent anti-*E.coli* an-  
12 tibody immobilization onto the surface of the electrode. The electrochemical behavior of each func-  
13 tionalization step (**Fig. 2C**) was analyzed by cyclic voltammetry (CV) and electrochemical imped-  
14 ance spectroscopy (EIS) (**Fig. 3A**). The CV data and Bode plots revealed that the bare GPE elec-  
15 trode (brown line) possessed a resistance to charge transfer of  $66.8 \pm 8.7 \Omega$ , indicating a small re-  
16 sistance toward redox conversion of ( $[\text{Fe}(\text{CN})_6]^{3-/4-}$ ) complex and a high rate of electron transfer on  
17 the electrode surface. This result was in agreement with the current value of  $135.3 \pm 7.3 \mu\text{A}$  shown  
18 for the same electrode by CV plot (brown line). Next, we modified the WE with thyroxine (red line),  
19 leading to an increased current resistance to  $73.1 \pm 5.6 \Omega$  and decreased current of  $120.8 \pm 8.9 \mu\text{A}$ .  
20 These data indicate that thyroxine acts as an electrical insulator hindering the electron transfer at  
21 the interface of the WE by inhibiting the redox probe from reaching the WE surface. Ferrocene were  
22 then anchored covalently to the surface of the GPE (blue line) through an ion bond between the  
23 iodine group from the thyroxine and the ferric groups from the ferrocene. The functionalization of  
24 ferrocene modified GPE led to decreased values of current resistance ( $38.7 \pm 1.3 \Omega$ ) and increased  
25 transfer current ( $180.7 \pm 2.3 \mu\text{A}$ ) compared to the previous functionalization step (**Fig. 2C&3A**). **Fig.**  
26 **3B** shows a magnitude view of the plots in high-frequency regions. The higher current and lower



1 charge transfer resistance detected resulted from the greater electrocatalytic and surface area  
2 presented by the ferrocene [8], which contributed to fast electron-transfer kinetics, and thus con-  
3 ferring attractive features for sensor development [9]. In addition, the ammonia, free iodine, and  
4 ferric cation functional groups presented on the thyroxine/ferrocene–modified WE led to favorable  
5 electrostatic interactions of the anionic probe  $[\text{Fe}(\text{CN})_6]^{3-/4-}$ , providing an accumulation of the redox  
6 probe surrounding to the electrode interface. This improved electrochemical response, such as  
7 higher current peak, especially for whole cell detection. As a final functionalization step, we immo-  
8 bilized BSA to block the remaining unmodified electrochemical sites and to avoid nonspecific and  
9 undesired adsorption of other molecules (**Fig. 3C**). This step resulted in the highest resistance  
10 values ( $305.6 \pm 17.8 \Omega$ ) and lowest current ( $25.4 \pm 6.5 \mu\text{A}$ ), suggesting a continued decline in the  
11 charge transfer kinetics after anchoring BSA due to organic materials.

12

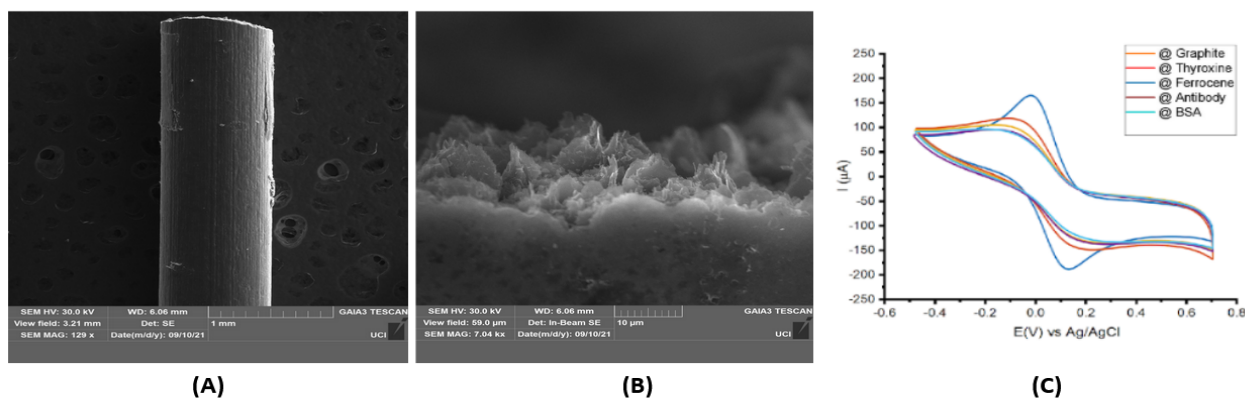

13

14 **Figure 2.** Characterization of pencil graphite electrode. (A) SEM image of bare 0.7 mm pencil  
15 graphite electrode surface at 129x magnification. (B) SEM image of 0.7 mm pencil graphite elec-  
16 trode after functionalization with Thyroxine and Ferrocene at 7.04kx magnification. (C) Cyclic  
17 voltammetry recorded for each bioconjugation step of the working electrode in a solution of 5.0 mM  
18  $[\text{Fe}(\text{CN})_6]^{3-/4-}$  containing 10 mM KCl as the supporting electrolyte at a scan rate of  $50 \text{ mV}\cdot\text{s}^{-1}$ .

19

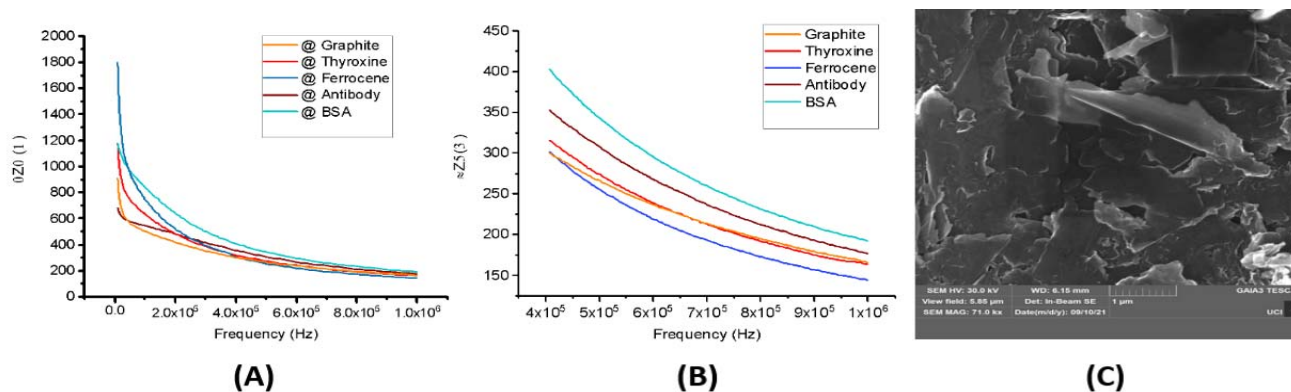

1  
2 **Figure 3.** Characterization of pencil graphite electrode. **(A)** Bode plots were obtained using the  
3 same conditions as in 2C. **(B)** An amplitude view of the plots in high-frequency regions. **(C)** SEM  
4 image of working electrode after being coated and blocked by antibody and BSA, accordingly, at  
5 71.0kx magnification.

### 6 3.3. Analytical Sensing of the Sensor

7 We used SWV for bacterial cell detection. This technique is highly sensitive, especially for  
8 detecting reversible redox species, such as potassium ferricyanide and ferrocyanide [10]. The  
9 sensing approach relied on the current signal decrease induced by specific interactions between the  
10 antibody and *E. coli* cells. The more presence of pathogen concentration leads to a more decrease  
11 in the current signal of the redox probe  $[\text{Fe}(\text{CN})_6]^{-3/-4}$ . This means that bacteria bound to WE par-  
12 tially blocked the redox probe access WE surface. The instrumental parameters including ampli-  
13 tude, frequency, and step potential) were optimized to enhance capacity detection of *E. coli* cells.  
14 The highest peak current values for the redox probe were obtained using an amplitude potential of  
15 90.0 mV, frequency of 115.0 Hz, and step potential of 10.0 mV). We obtained an analytical curve for  
16 different concentrations of *E. coli* in 100mM (PBS) (pH = 7.4) under optimized experimental condi-  
17 tions. The experiments were recorded in triplicate using an increased number of *E. coli*, from 25 to  
18 6400 cfu. The SWV signal obtained at each cell number was shown in **Fig. 4A**. The linear regression  
19 curve was calculated at concentrations ranging from 25 to 6400 cfu of *E. coli*, resulting in an ana-  
20 lytical sensitivity value of  $55 \pm 1.8 \mu\text{A}\cdot\text{cfu}^{-1}\cdot\text{mL}^{-1}$  and a linear coefficient of 0.97 (**Fig. 4B**). Next, we

1 conducted the optimal incubation time for detecting *E. coli* in spiking samples by evaluating the  
2 binding sensitivity parameter obtained from cell–response curves at 400 *E. coli* cells. The results  
3 were expressed as  $\Delta I = I - I_0$ , where  $I_0$  and  $I$  corresponds to the current recorded for the redox probe  
4 ( $[\text{Fe}(\text{CN})_6]^{3-/4-}$ ) before and after incubating the sample, respectively. The optimal incubation time  
5 was determined approximately in 5 to 7 min due to the highest value of the angular coefficient of the  
6 cell–response curves, referring to binding kinetics between the antibody and *E. coli*. Note that the  
7 SWV response for the redox probe  $[\text{Fe}(\text{CN})_6]^{3-/4-}$  decreased with increased concentration of *E.coli*  
8 due to decrease of current signal, which induced specific interaction between the *E.coli* and the  
9 antibody-coated WE (**Fig. 4C**). Binding of *E. coli* to the biosensor surface partially increase non-  
10 conductive layers on the electrode, leading to current drop and leading to indicate the presence of *E.*  
11 *coli* in the samples.

12 SWV is commonly used for assays that determine biological binding interactions and reflect the  
13 underlying binding kinetics even with small molecules [11,12]. The sensor enabled the rapid de-  
14 tection of *E. coli* cells (less than 100 cfu) providing high sensitivity, a low LOD in a complete 3D  
15 printing device with pencil graphite used as a WE. The threshold cycle (Ct) of the RT-PCR data  
16 (primers in **Table 1**) for cell concentration from 25 to 400 cells ranged from 21.7 to 29.3 Ct. It is  
17 important to highlight that our results (current signal) presented a high linearity ( $R^2 = 0.954$ ) with the  
18 Ct values.

19 **Table 1:** Primers used for quantitative PCR

| Name                   | Primers                                                                       | PCR length<br>(bp) |
|------------------------|-------------------------------------------------------------------------------|--------------------|
| E.Coli (DH5 $\alpha$ ) | 5'- TCG ACC TGA TAT CCC TGT TGT TG -3'<br>5'- GTG TCA TCT AAA GGC TGC GTG -3' | 170 bp             |

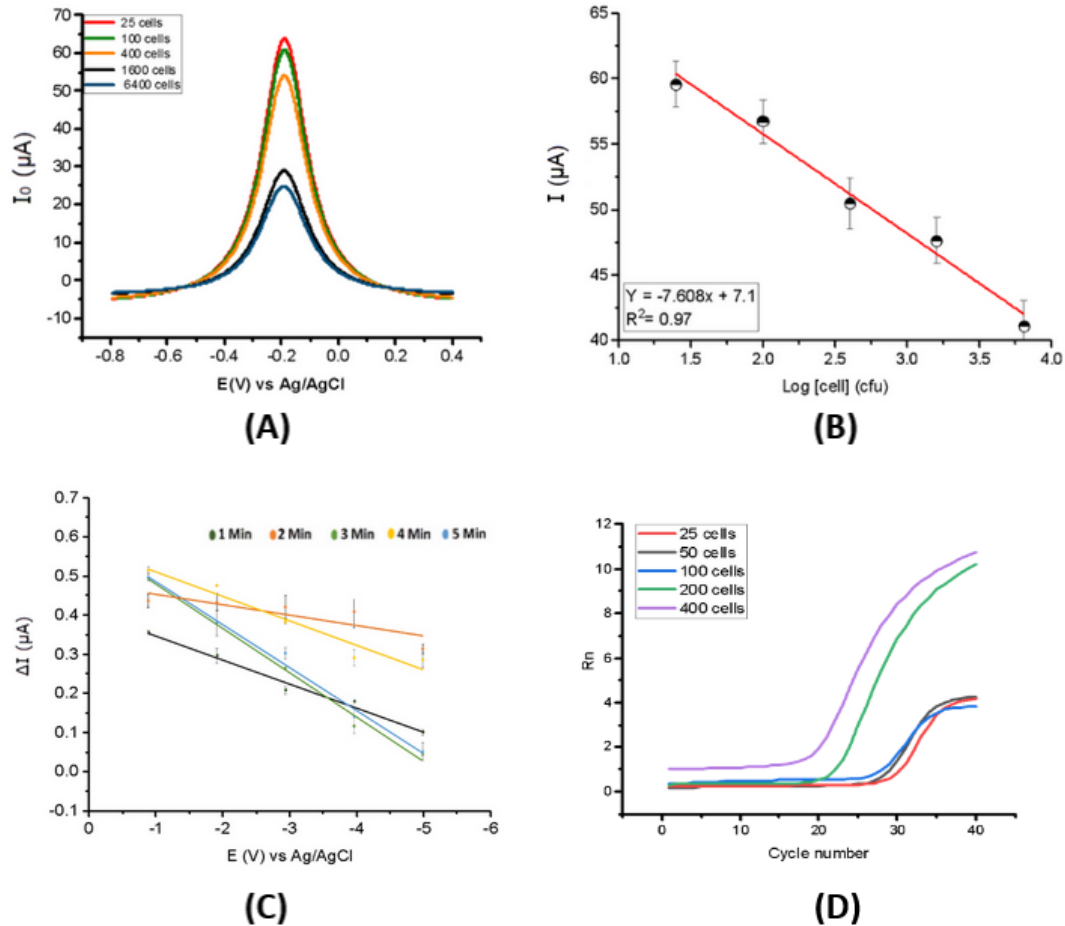

1

2 **Figure 4.** Sensing study of *E. coli* bacteria on the sensor. **(A)** Baseline-corrected SWVs of the 5.0  
3 mM  $[\text{Fe}(\text{CN})_6]^{3-/4-}$  redox probe containing 0.1 mol·L<sup>-1</sup> KCl as the supporting electrolyte after in-  
4 cubating the working electrode with different concentrations of *E. coli* cells ranging from 25 to 6400  
5 cells (approximately). **(B)** Linear regression (triplicate experiment) was retrieved from Fig. 4A, using  
6 the drop of current signal. **(C)** A time course (from 1 to 5 min) of binding pattern of *E. coli* cells on the  
7 modified electrode using 25 to 6400 *E. coli* cells. Distinct linear regression curve was obtained after 3  
8 min. **(D)** Validation data of the presence of *E. coli* the samples by qPCR.

### 9 3.4. Cross-Reactivity Assays

10 Cross-reactivity studies between *E. coli* strains were carried out to investigate the specificity of  
11 our biosensor device toward DH5 $\alpha$  and rule out potential off-target reactivity **(Fig. 5)**. Using the  
12 same experimental conditions as for DH5 $\alpha$  **(Fig. 4)**, we tested four other *E. coli* strains including,

1 BL21, DH5 $\alpha$ , and JM109. DH5 $\alpha$  (**Fig. 5A**) and TOP10 (**Fig. 5B**) showed specificity with the antibody  
2 coated into WE, which presented a current drop ( $\Delta I$ ) lower than the cutoff value of 37  $\mu A$  obtained by  
3 SWV for the lowest *E. coli* concentration detected. BL21 (**Fig. 5C**) and JM109 (**Fig. 5D**) showed less  
4 cross reactivity to the coated antibody. The cross reactivity could be due to shared epitopes of  
5 surface proteins between *E. coli* strains that led to reduced specific binding affinity toward whole cell  
6 detection [13,14]. Development of recognition receptors for whole cell biosensors based on spe-  
7 cies-specific epitopes or aptamers should be a part of biosensor engineering.

8

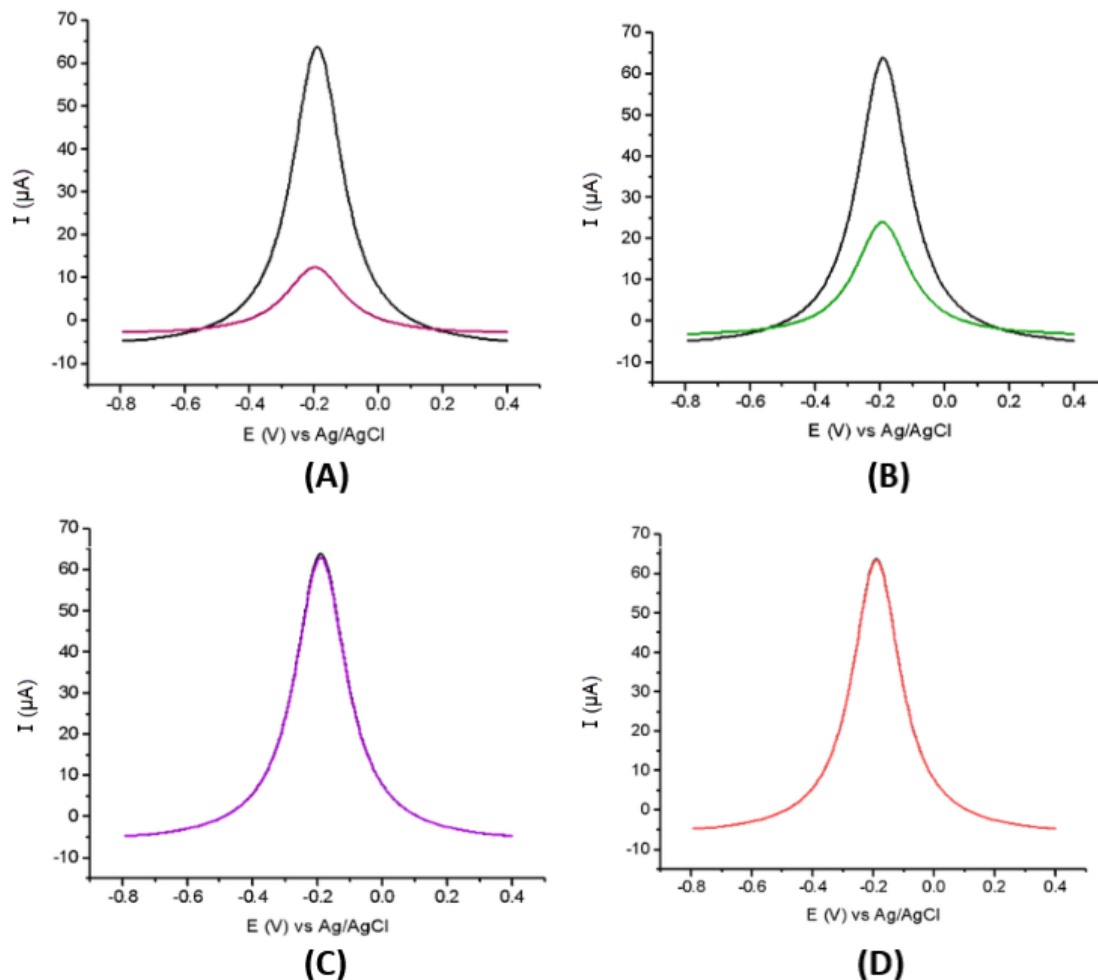

9

10 **Figure 5.** Specificity studies of the sensor using four laboratory *E. coli* strains. (A) DH5 $\alpha$ , (B)  
11 TOP10, (C) BL21, (D) JM109. Black lines are baseline corrected SWV before challenging with

1 bacteria sample. Experimental conditions were conducted as the same conditions described in this  
2 study.

### 3 **4. Conclusions**

4 We present a simple, inexpensive, and portable electrochemical biosensor based on 3D  
5 printing technique that enables diagnosis of pathogen bacteria within 15 min using 500  $\mu$ L of sample  
6 and highly accessible and commercially available materials (i.e., graphite pencil leads and 3D  
7 printing), yielding a test that costs \$2.50. The WE can be functionalized in less than 3 h and remains  
8 stable for over 5 d when stored in a PBS solution at 4 °C. The sensor displayed high sensitivity for  
9 detecting whole *E. coli* cell (53 cfu and 270 cfu) and showed cross-react with TOP10 and JM109 due  
10 to shared epitopes. The robustness and accuracy of the sensors were successfully evaluated by  
11 analyzing 27 spiking samples for whole cell detection, indicating that our method does not require  
12 further adaptations to accurately detect *E.coli* in spiking samples. Additionally, it may enable mon-  
13 itoring other pathogens since the modification of the electrodes with other recognition elements can  
14 be performed and easy to operate and integrate to a wireless system. Finally, the sensor can be  
15 applied for pathogens in biosafety, aquaculture, and water quality as long as the recognition ele-  
16 ments (like aptamers and antibodies) are available.

1 **Author Contributions**

2 Conceptualization

3 Anh H. Nguyen, Hung Cao

4 Data curation

5 Samir Malhotra, Anh H. Nguyen, Dang Song Pham,

6 Formal analysis

7 Samir Malhotra, Anh H. Nguyen, Dang Song Pham,

8 Investigation

9 Samir Malhotra, Anh H. Nguyen, Dang Song Pham,

10 Methodology

11 Samir Malhotra, Anh H. Nguyen, Dang Song Pham, Hung Cao

12 Writing – original draft

13 Samir Malhotra, Anh H. Nguyen.

14 Writing – review & editing

15 Samir Malhotra, Anh H. Nguyen, Dang Song Pham, Hung Cao

16

17 **Acknowledgement**

18 The authors would like to acknowledge the financial support from the NSF CAREER Award

19 #1917105 (H.C.), the NSF #1936519 (J.L. and H.C), the NIH SBIR grant #R44OD024874 (M.P.H.L

20 and H.C.), the NIH HL107304 and HL081753 (X.X.).

21

## 1 References

- 2 1. Allocati, N.; Masulli, M.; Alexeyev, M. F.; Di Ilio, C.; Escherichia coli in Europe: an overview. *Int.*  
3 *J. Environ. Res. Public Health* **2013**, *10*(12), 6235-6254, doi:10.3390/ijerph10126235
- 4 2. Kaper, J.B.; Nataro, J.P.; Mobley, H.L.; Pathogenic Escherichia coli. *Nat Rev Microbiol.* **2004**,  
5 *2*(2), 123-140, doi:10.1038/nrmicro818.
- 6 3. Ahmed, A.; Rushworth, J.V.; Hirst, N.A.; Millner, P.A.; Biosensors for whole-cell bacterial de-  
7 tection. *Clinical microbiology reviews* **2014**, *27*(3), 631–646, doi:10.1128/CMR.00120-13
- 8 4. Ahovan, Z.A.; Hashemi, A.; De Plano, L.M.; Gholipourmalekabadi, M.; Seifalian, A.; Bacterio-  
9 phage Based Biosensors: Trends, Outcomes and Challenges. *Nanomaterials* **2020**, *10*(3), 501,  
10 doi:10.3390/nano10030501
- 11 5. Ahmadi, S.; Fini, H.; Ho, T.; Nadoushan, P.J.; Kraatz, H.-B.; Kerman, K.; Development of an  
12 Electrochemical Sensor Using Pencil Graphite Electrode for Monitoring UV-Induced DNA  
13 Damage. *J. Chem. Educ.* **2020**, *97*(12), 4445-4452, doi:10.1021/acs.jchemed.9b01065
- 14 6. de Lima, L.F.; Ferreira, A.L.; Torres, M.D.T.; de Araujo, W.R.; de la Fuente-Nunez, C.; Mi-  
15 nute-scale detection of SARS-CoV-2 using a low-cost biosensor composed of pencil graphite  
16 electrodes. *PNAS* **2021**, *118*(30), e2106724118, doi:10.1073/pnas.2106724118
- 17 7. Oliveira, J.P.; Prado, A.R.; Keijok, W.J.; Antunes, P.W.P.; Yapuchura, E.R.; Guimarães,  
18 M.C.C.; Impact of conjugation strategies for targeting of antibodies in gold nanoparticles for ul-  
19 trasensitive detection of 17 $\beta$ -estradiol. *Sci. Rep.* **2019**, *9*, 13859,  
20 doi:10.1038/s41598-019-50424-5.
- 21 8. Smalley, J.F.; Feldberg, S.W.; Chidsey, C.E.D.; Linford, M.R.; Newton, M.D.; Liu, Y.-P.; The  
22 Kinetics of Electron Transfer Through Ferrocene-Terminated Alkanethiol Monolayers on Gold.  
23 *J. Phys. Chem.* **1995**, *99*(35), 13141-13149, doi:10.1021/j100035a016
- 24 9. Beitollahi, H.; Khalilzadeh, M.A.; Tajik, S.; Safaei, M.; Zhang, K.; Jang, H.W.; Shokouhimehr,  
25 M.; Recent Advances in Applications of Voltammetric Sensors Modified with Ferrocene and Its  
26 Derivatives. *ACS Omega* **2020**, *5*(5), 2049-2059, doi:10.1021/acsomega.9b03788



- 1 10. Scott, K.; 2 - Electrochemical principles and characterization of bioelectrochemical systems. In  
2 *Microbial Electrochemical and Fuel Cells*; Scott, K., Yu, E.H., Eds.; Woodhead Publishing:  
3 Sawston, England, 2016; pp. 29-66, ISBN 978-1-78242-375-1
- 4 11. Pandey, B.; Bhattarai, J.K.; Pornsuriyasak, P.; Fujikawa, K.; Catania, R.; Demchenko, A.V.;  
5 Stine, K.J.; Square-wave voltammetry assays for glycoproteins on nanoporous gold. *J.*  
6 *Electroanal. Chem.* **2014**, *717-718*, 47-60, doi:10.1016/j.jelechem.2014.01.009
- 7 12. Ramotowska, S.; Ciesielska, A.; Makowski, M.; What Can Electrochemical Methods Offer in  
8 Determining DNA-Drug Interactions?. *Molecules* **2021**, *26*(11), 3478,  
9 doi:10.3390/molecules26113478
- 10 13. Hans, R.; Yadav, P.K.; Sharma, P.K.; Boopathi, M.; Thavaselvam, D.; Development and vali-  
11 dation of immunoassay for whole cell detection of *Brucella abortus* and *Brucella melitensis*. *Sci.*  
12 *Rep.* **2020**, *10*(1), 8543, doi:10.1038/s41598-020-65347-9
- 13 14. Sotnikov, D.V.; Zherdev, A.V.; Zvereva, E.A.; Eremin, S.A.; Dzantiev, B.B.; Changing  
14 Cross-Reactivity for Different Immunoassays Using the Same Antibodies: Theoretical Descrip-  
15 tion and Experimental Confirmation. *Appl. Sci.* **2021**, *11*(14), 6581; doi:10.3390/app11146581
